# Supplementary material for: The farnesoid X receptor negatively regulates osteoclastogenesis in bone remodeling and pathological bone loss
Source: PubMed Central journal article supplement (PMC5652726; doi:10.18632/oncotarget.20576), 2017-08-28
Supplement: oncotarget-08-76558-s001.pdf [file oncotarget-08-76558-s001.pdf]

## The farnesoid X receptor negatively regulates osteoclastogenesis in bone remodeling and pathological bone loss

### SUPPLEMENTARY MATERIALS

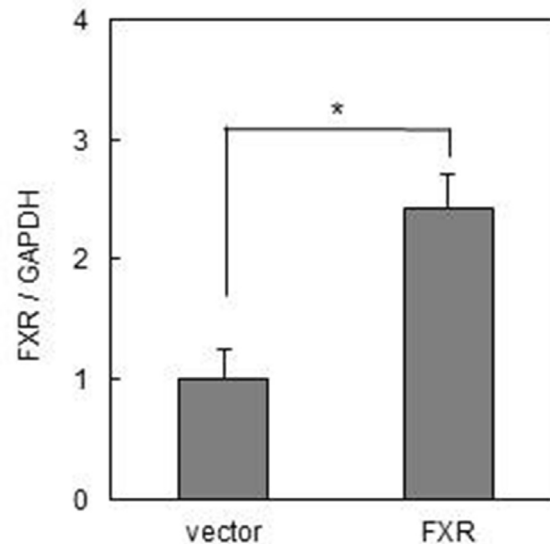

**Supplementary Figure 1: Overexpression of farnesoid X receptor (FXR) in FXR<sup>+/+</sup> bone marrow-derived macrophages (BMMs).** BMMs were infected through a retrovirus packaging system. The mRNA expression of FXR in infected BMMs was analyzed by real-time PCR. \*  $p < 0.05$

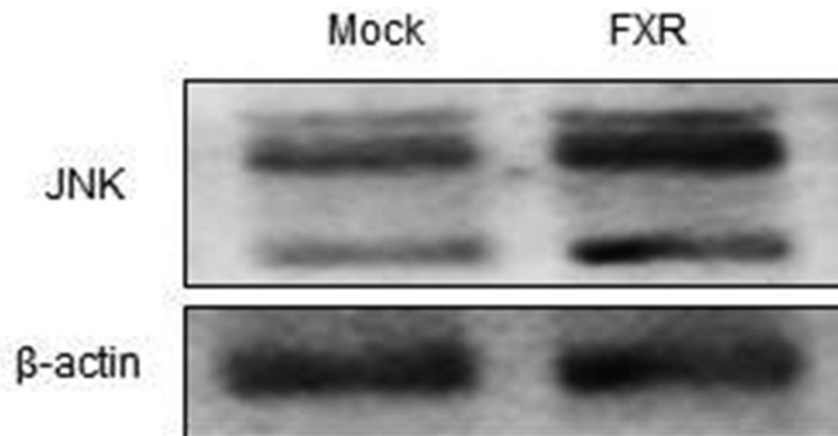

**Supplementary Figure 2: Modulation of JNK1/2 expression levels by overexpression of FXR.** BMMs were infected by mock or FXR through a retrovirus packaging system. The protein expression of JNK1/2 in infected BMMs was analyzed by western blotting.

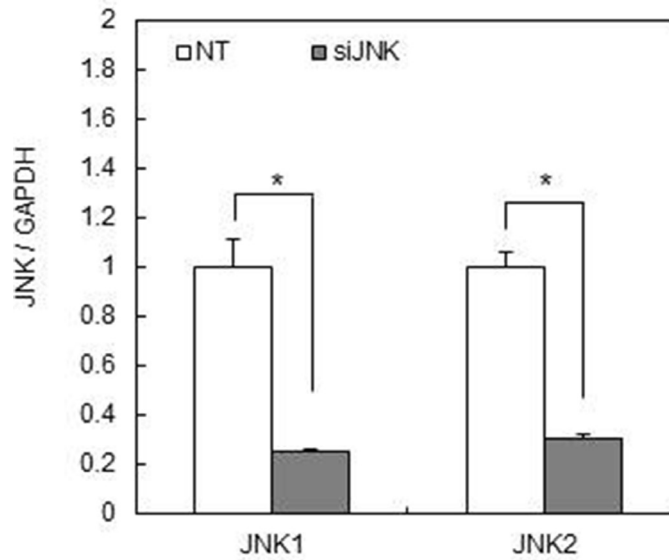

**Supplementary Figure 3: The JNK1/2 mRNA levels by knockdown of JNK.** The mRNA expression level of JNK1/2 in siRNA-transfected BMMs was analyzed by real-time PCR. \*  $p < 0.05$

**Supplementary Table 1: Mouse genes primers used for real-time PCR analysis**

| Mouse genes   | primer sequences                                                               |
|---------------|--------------------------------------------------------------------------------|
| FXR           | 5'-TGT GAG GGC TGC AAA GGT TT-3'<br>5'-ACA TCC CCA TCT CTC TGC AC-3'           |
| JNK1          | 5'-TGC CAT CAT GAG CAG AAG CAA ACG-3'<br>5'-TCT GAT TCT GAA ATG GCC GGC TGA-3' |
| JNK2          | 5'-GTG GCG GAC TCA ACT TTC ACT GTT-3'<br>5'-TCT CTT TGC GTG CGT TTG GTT CTG-3' |
| PPAR $\gamma$ | 5'-TGC TGT TAT GGG TGA AAC TCT GGG-3'<br>5'-GGCTTGATGTCAAAGGAATGCG-3'          |
| PGC-1 $\beta$ | 5'-TACATGCATACCTACTGCCTGCCT-3'<br>5'-TTGGGCCAGAAGTTCCTTAGGAT-3'                |
| JAK3          | 5'-TTA CAA AGCCTGTCTGCCG-3'<br>5'-TCCAGGAGATGCCGTTGTC-3'                       |
| IFN- $\beta$  | 5'-CTGGCTTCCATCATGAACAA-3'<br>5'-CATTTCGAATGTTTCGTCCT-3'                       |
| GAPDH         | 5'-TGCACCACCAACTGCTTATTAGC-3'<br>5'-GGCATGGACTGTGGTCATGAG-3'                   |
